# Supplementary material for: Feasibility and sensitivity study of radiomic features in photoacoustic imaging of patient-derived xenografts
Source: PubMed Central journal article supplement (PMC9452574; doi:10.1038/s41598-022-19084-w), 2022-09-07
Supplement: 41598_2022_19084_MOESM1_ESM.pdf [file 41598_2022_19084_MOESM1_ESM.pdf]

# Feasibility and Sensitivity Study of Radiomic Features in Photoacoustic Imaging of Patient-Derived Xenografts

**Lorena Escudero Sanchez**<sup>1,2,\*†</sup>, **Emma Brown**<sup>3,4,5,†</sup>, **Leonardo Rundo**<sup>1,2,6</sup>, **Stephan Ursprung**<sup>1,2</sup>, **Evis Sala**<sup>1,2</sup>, **Sarah E. Bohndiek**<sup>3,4</sup>, and **Ignacio Xavier Partarrieu**<sup>7,\*</sup>

<sup>1</sup>Department of Radiology, University of Cambridge, CB2 0QQ Cambridge, UK

<sup>2</sup>Cancer Research UK Cambridge Centre, University of Cambridge, CB2 0RE Cambridge, UK

<sup>3</sup>Department of Physics, University of Cambridge, CB3 0HE, Cambridge, UK

<sup>4</sup>Cancer Research UK Cambridge Institute, University of Cambridge, CB2 0RE Cambridge, UK

<sup>5</sup>Washington University School of Medicine in St Louis, 63110, MO, USA

<sup>6</sup>Department of Information and Electrical Engineering and Applied Mathematics (DIEM), University of Salerno, 84084 Fisciano (SA), Italy

<sup>7</sup>Independent researcher

†These authors contributed equally

\*Correspondence and requests for materials should be addressed to L.E.S. and I.X.P. (les44@cam.ac.uk)

## Supplementary Material

| <b>List</b> | <b>of</b>                                                                                                                                                                                                                                                                                                                                                                                                       | <b>Figures</b> |
|-------------|-----------------------------------------------------------------------------------------------------------------------------------------------------------------------------------------------------------------------------------------------------------------------------------------------------------------------------------------------------------------------------------------------------------------|----------------|
| SF1         | Histograms with the pixel values of the segmented VOIs per case, using as example the backprojection reconstruction and 800nm scans. Blue: basal model; red: luminal model. . . . .                                                                                                                                                                                                                             | 6              |
| SF2         | Distribution of volumes of the VOIs of tumours corresponding to basal model (left) and luminal model (right). . .                                                                                                                                                                                                                                                                                               | 7              |
| SF3         | Example of volume correction performed to three features: <i>firstorder Energy</i> (top), <i>GLDM DependenceNonUniformity</i> (centre) and <i>NGTDM Coarseness</i> (bottom). On the left column, values of the features as a function of the number of voxels of the VOI before correction; on the right column, after correction. Red lines represent the function best fitting the data in each case. . . . . | 8              |
| SF4         | p-values of the Kruskal-Wallis test to establish whether each radiomic feature has a correlation with the model (basal vs luminal) or not (null hypothesis). The horizontal line shows the critical value, after the Benjamini-Hochberg correction has been applied to reduce the false positive rate. . . . .                                                                                                  | 9              |
| SF5         | Pair-wise correlations (left) and p-values (right) for each pair of radiomic features, computed using repeated measures correlation. The Feature IDs correspond to those in Tables ST1 and ST2. . . . .                                                                                                                                                                                                         | 9              |

| <b>List</b> | <b>of</b>                                                                                                                                                                                                                                                                                    | <b>Tables</b> |
|-------------|----------------------------------------------------------------------------------------------------------------------------------------------------------------------------------------------------------------------------------------------------------------------------------------------|---------------|
| ST1         | Feature names and IDs for features corresponding to the categories <i>first order</i> and Grey Level Co-occurrence Matrix ( <i>GLCM</i> ). . . . .                                                                                                                                           | 4             |
| ST2         | Feature names and IDs for features corresponding to the categories Grey Level Dependence Matrix ( <i>GLDM</i> ), Grey Level Run Length Matrix ( <i>GLRLM</i> ), Grey Level Size Zone Matrix ( <i>GLSZM</i> ) and Neighbouring Grey Tone Difference Matrix Features ( <i>NGTDM</i> ). . . . . | 5             |
| ST3         | Discarded features after the Kruskal-Wallis test with Benjamini-Hochberg correction. . . . .                                                                                                                                                                                                 | 10            |
| ST4         | Scores of three different classifiers, Random Forest, Gradient Boosting and Support Vector Machines, for each radiomic feature individually corresponding to the categories <i>first order</i> and <i>GLCM</i> . . . . .                                                                     | 11            |
| ST5         | Scores of three different classifiers, Random Forest, Gradient Boosting and Support Vector Machines, for each radiomic feature individually corresponding to the categories <i>GLDM</i> , <i>GLRLM</i> , <i>GLSZM</i> and <i>NGTDM</i> . . . . .                                             | 12            |

| ID | Feature                        |
|----|--------------------------------|
| 1  | FO 10Percentile                |
| 2  | FO 90Percentile                |
| 3  | FO Energy                      |
| 4  | FO Entropy                     |
| 5  | FO InterquartileRange          |
| 6  | FO Kurtosis                    |
| 7  | FO Maximum                     |
| 8  | FO MeanAbsoluteDeviation       |
| 9  | FO Mean                        |
| 10 | FO Median                      |
| 11 | FO Minimum                     |
| 12 | FO Range                       |
| 13 | FO RobustMeanAbsoluteDeviation |
| 14 | FO RootMeanSquared             |
| 15 | FO Skewness                    |
| 16 | FO TotalEnergy                 |
| 17 | FO Uniformity                  |
| 18 | FO Variance                    |
| 19 | GLCM Autocorrelation           |
| 20 | GLCM ClusterProminence         |
| 21 | GLCM ClusterShade              |
| 22 | GLCM ClusterTendency           |
| 23 | GLCM Contrast                  |
| 24 | GLCM Correlation               |
| 25 | GLCM DifferenceAverage         |
| 26 | GLCM DifferenceEntropy         |
| 27 | GLCM DifferenceVariance        |
| 28 | GLCM Id                        |
| 29 | GLCM Idm                       |
| 30 | GLCM Idmn                      |
| 31 | GLCM Idn                       |
| 32 | GLCM Imc1                      |
| 33 | GLCM Imc2                      |
| 34 | GLCM InverseVariance           |
| 35 | GLCM JointAverage              |
| 36 | GLCM JointEnergy               |
| 37 | GLCM JointEntropy              |
| 38 | GLCM MCC                       |
| 39 | GLCM MaximumProbability        |
| 40 | GLCM SumAverage                |
| 41 | GLCM SumEntropy                |
| 42 | GLCM SumSquares                |

**Table ST1.** Feature names and IDs for features corresponding to the categories *first order* and Grey Level Co-occurrence Matrix (*GLCM*).

| ID | Feature                                   |
|----|-------------------------------------------|
| 43 | GLDM DependenceEntropy                    |
| 44 | GLDM DependenceNonUniformity              |
| 45 | GLDM DependenceNonUniformityNormalized    |
| 46 | GLDM DependenceVariance                   |
| 47 | GLDM GrayLevelNonUniformity               |
| 48 | GLDM GrayLevelVariance                    |
| 49 | GLDM HighGrayLevelEmphasis                |
| 50 | GLDM LargeDependenceEmphasis              |
| 51 | GLDM LargeDependenceHighGrayLevelEmphasis |
| 52 | GLDM LargeDependenceLowGrayLevelEmphasis  |
| 53 | GLDM LowGrayLevelEmphasis                 |
| 54 | GLDM SmallDependenceEmphasis              |
| 55 | GLDM SmallDependenceHighGrayLevelEmphasis |
| 56 | GLDM SmallDependenceLowGrayLevelEmphasis  |
| 57 | GLRLM GrayLevelNonUniformity              |
| 58 | GLRLM GrayLevelNonUniformityNormalized    |
| 59 | GLRLM GrayLevelVariance                   |
| 60 | GLRLM HighGrayLevelRunEmphasis            |
| 61 | GLRLM LongRunEmphasis                     |
| 62 | GLRLM LongRunHighGrayLevelEmphasis        |
| 63 | GLRLM LongRunLowGrayLevelEmphasis         |
| 64 | GLRLM LowGrayLevelRunEmphasis             |
| 65 | GLRLM RunEntropy                          |
| 66 | GLRLM RunLengthNonUniformity              |
| 67 | GLRLM RunLengthNonUniformityNormalized    |
| 68 | GLRLM RunPercentage                       |
| 69 | GLRLM RunVariance                         |
| 70 | GLRLM ShortRunEmphasis                    |
| 71 | GLRLM ShortRunHighGrayLevelEmphasis       |
| 72 | GLRLM ShortRunLowGrayLevelEmphasis        |
| 73 | GLSZM GrayLevelNonUniformity              |
| 74 | GLSZM GrayLevelNonUniformityNormalized    |
| 75 | GLSZM GrayLevelVariance                   |
| 76 | GLSZM HighGrayLevelZoneEmphasis           |
| 77 | GLSZM LargeAreaEmphasis                   |
| 78 | GLSZM LargeAreaHighGrayLevelEmphasis      |
| 79 | GLSZM LargeAreaLowGrayLevelEmphasis       |
| 80 | GLSZM LowGrayLevelZoneEmphasis            |
| 81 | GLSZM SizeZoneNonUniformity               |
| 82 | GLSZM SizeZoneNonUniformityNormalized     |
| 83 | GLSZM SmallAreaEmphasis                   |
| 84 | GLSZM SmallAreaHighGrayLevelEmphasis      |
| 85 | GLSZM SmallAreaLowGrayLevelEmphasis       |
| 86 | GLSZM ZoneEntropy                         |
| 87 | GLSZM ZonePercentage                      |
| 88 | GLSZM ZoneVariance                        |
| 89 | NGTDM Busyness                            |
| 90 | NGTDM Coarseness                          |
| 91 | NGTDM Complexity                          |
| 92 | NGTDM Contrast                            |
| 93 | NGTDM Strength                            |

**Table ST2.** Feature names and IDs for features corresponding to the categories Grey Level Dependence Matrix (*GLDM*), Grey Level Run Length Matrix (*GLRLM*), Grey Level Size Zone Matrix (*GLSZM*) and Neighbouring Grey Tone Difference Matrix Features (*NGTDM*).

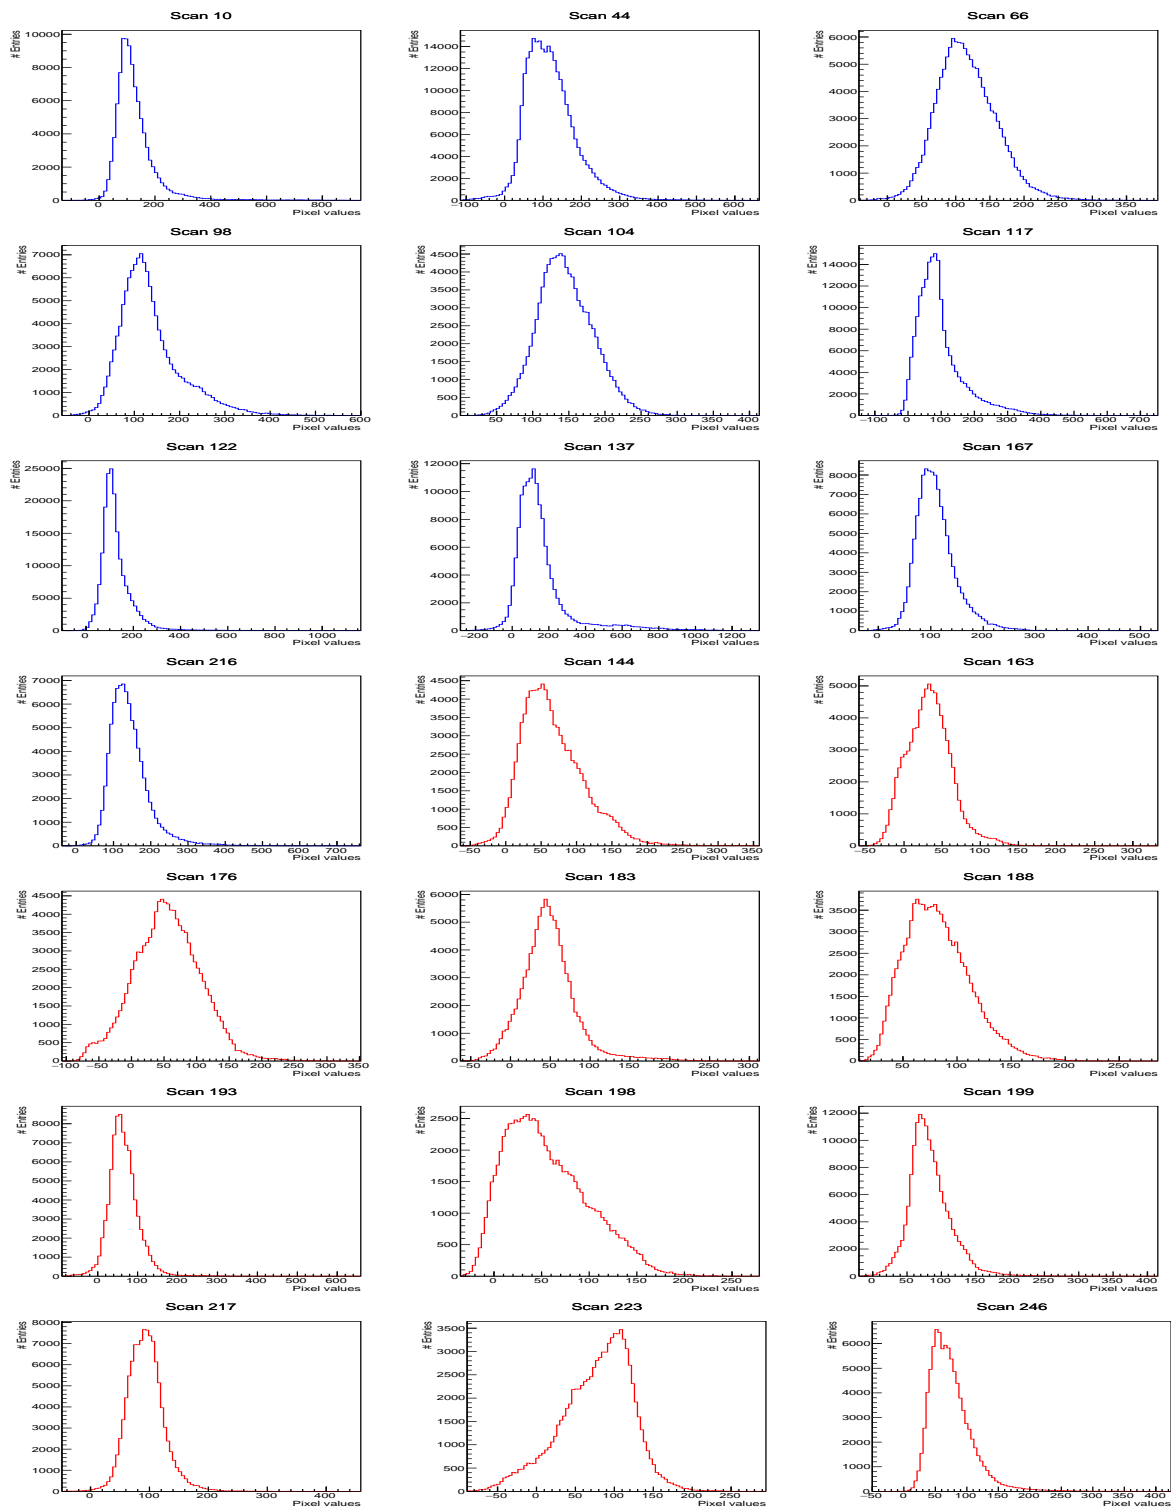

**Figure SF1.** Histograms with the pixel values of the segmented VOIs per case, using as example the backprojection reconstruction and 800nm scans. Blue: basal model; red: luminal model.

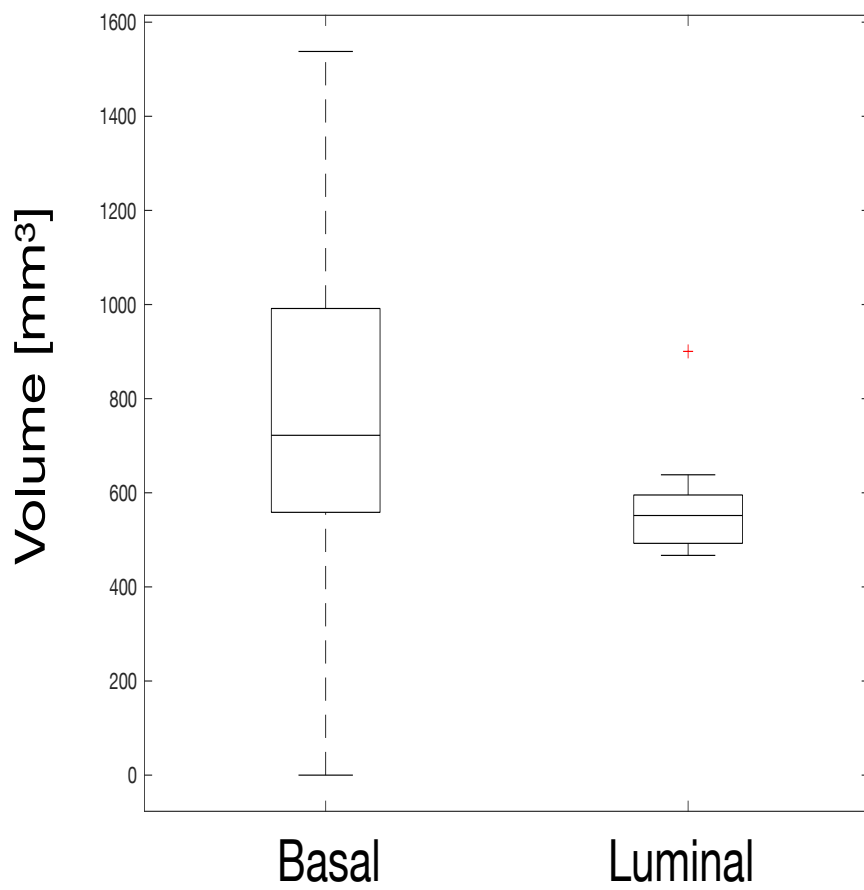

**Figure SF2.** Distribution of volumes of the VOIs of tumours corresponding to basal model (left) and luminal model (right).

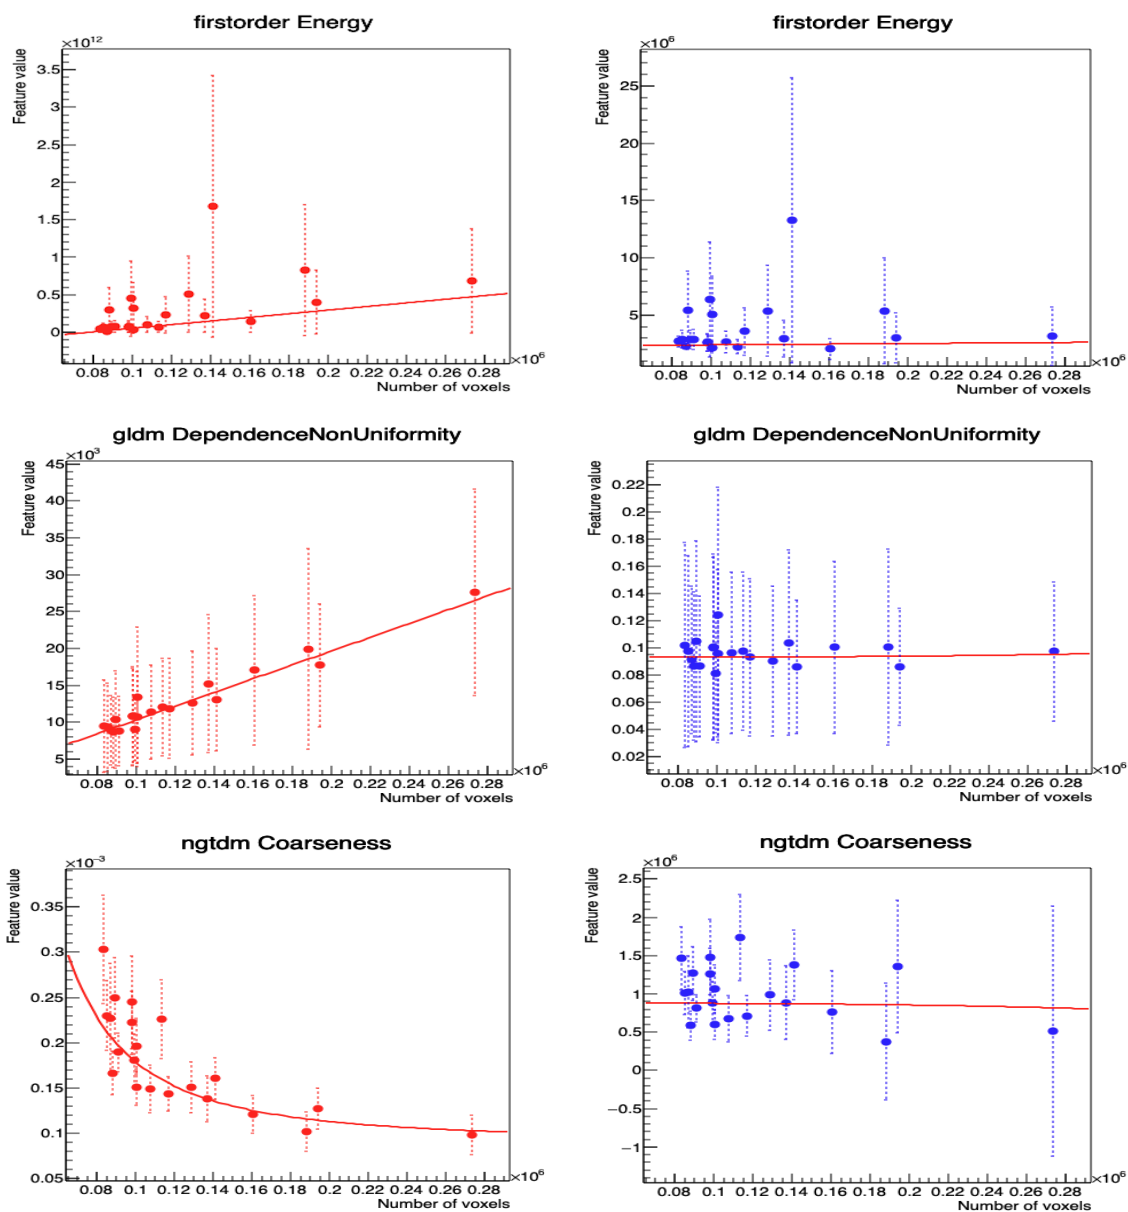

**Figure SF3.** Example of volume correction performed to three features: *firstorder Energy* (top), *GLDM DependenceNonUniformity* (centre) and *NGTDM Coarseness* (bottom). On the left column, values of the features as a function of the number of voxels of the VOI before correction; on the right column, after correction. Red lines represent the function best fitting the data in each case.



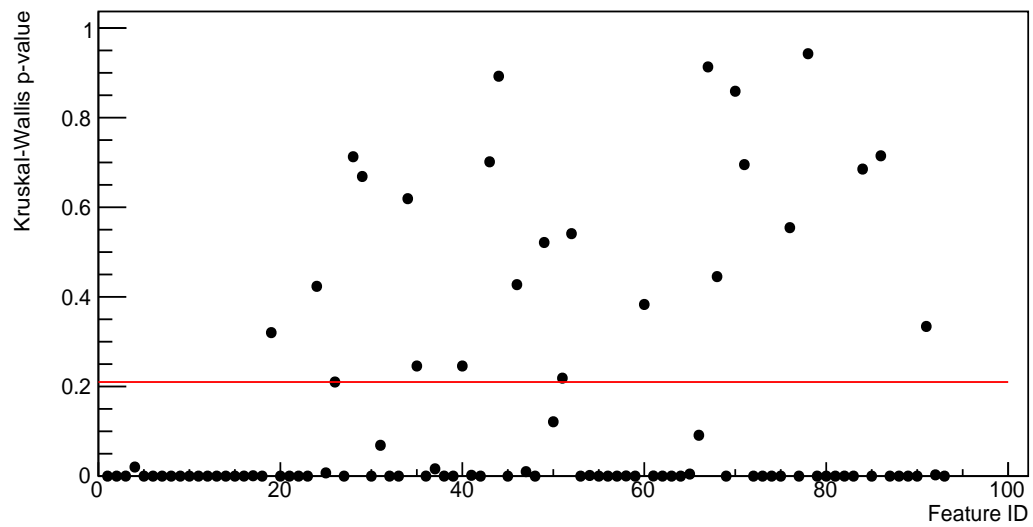

**Figure SF4.** p-values of the Kruskal-Wallis test to establish whether each radiomic feature has a correlation with the model (basal vs luminal) or not (null hypothesis). The horizontal line shows the critical value, after the Benjamini-Hochberg correction has been applied to reduce the false positive rate.

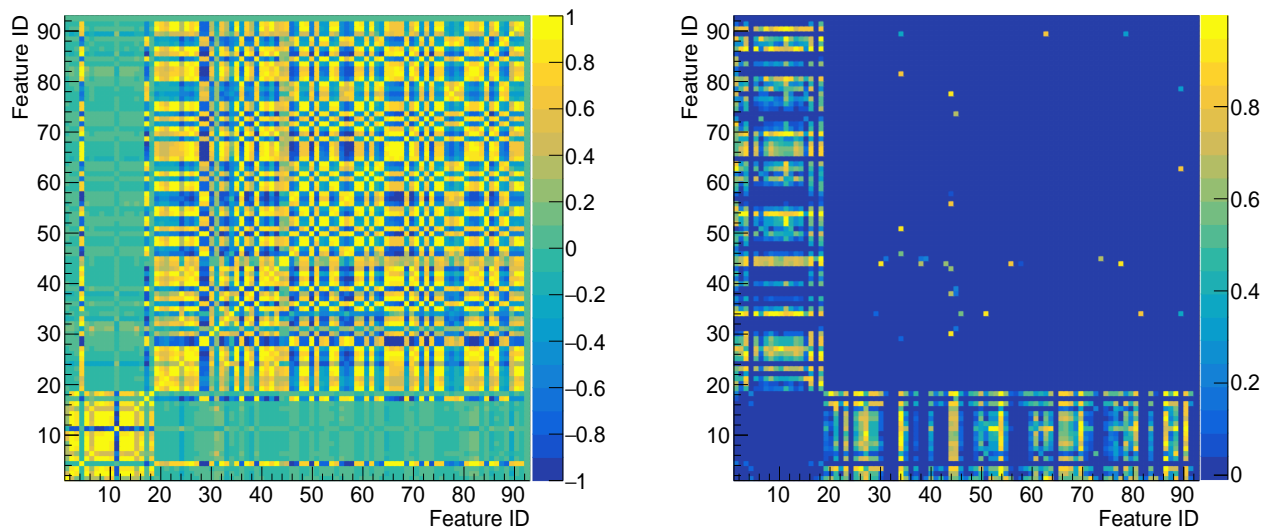

**Figure SF5.** Pair-wise correlations (left) and p-values (right) for each pair of radiomic features, computed using repeated measures correlation. The Feature IDs correspond to those in Tables ST1 and ST2.

| Feature Name                              | p-value | rank | corrected value |
|-------------------------------------------|---------|------|-----------------|
| GLCM DifferenceEntropy                    | 0.210   | 70   | 0.188           |
| GLDM LargeDependenceHighGrayLevelEmphasis | 0.219   | 71   | 0.191           |
| GLCM JointAverage                         | 0.246   | 72   | 0.194           |
| GLCM SumAverage                           | 0.246   | 73   | 0.196           |
| GLCM Autocorrelation                      | 0.320   | 74   | 0.199           |
| NGTDM Complexity                          | 0.334   | 75   | 0.202           |
| GLRLM HighGrayLevelRunEmphasis            | 0.383   | 76   | 0.204           |
| GLCM Correlation                          | 0.424   | 77   | 0.207           |
| GLDM DependenceVariance                   | 0.427   | 78   | 0.210           |
| GLRLM RunPercentage                       | 0.445   | 79   | 0.212           |
| GLDM HighGrayLevelEmphasis                | 0.521   | 80   | 0.215           |
| GLDM LargeDependenceLowGrayLevelEmphasis  | 0.541   | 81   | 0.218           |
| GLSZM HighGrayLevelZoneEmphasis           | 0.555   | 82   | 0.220           |
| GLCM InverseVariance                      | 0.619   | 83   | 0.223           |
| GLCM Idm                                  | 0.669   | 84   | 0.226           |
| GLSZM SmallAreaHighGrayLevelEmphasis      | 0.685   | 85   | 0.228           |
| GLRLM ShortRunHighGrayLevelEmphasis       | 0.695   | 86   | 0.231           |
| GLDM DependenceEntropy                    | 0.701   | 87   | 0.234           |
| GLCM Id                                   | 0.713   | 88   | 0.237           |
| GLSZM ZoneEntropy                         | 0.715   | 89   | 0.239           |
| GLRLM ShortRunEmphasis                    | 0.859   | 90   | 0.242           |
| GLDM DependenceNonUniformity              | 0.892   | 91   | 0.245           |
| GLRLM RunLengthNonUniformityNormalized    | 0.913   | 92   | 0.247           |
| GLSZM LargeAreaHighGrayLevelEmphasis      | 0.943   | 93   | 0.25            |

**Table ST3.** Discarded features after the Kruskal-Wallis test with Benjamini-Hochberg correction.

| ID | Feature                        | Random Forest | Gradient Boosting | SVM   | Average |
|----|--------------------------------|---------------|-------------------|-------|---------|
| 1  | FO 10Percentile                | 0.823         | 1.000             | 0.913 | 0.912   |
| 2  | FO 90Percentile                | 1.000         | 1.000             | 1.000 | 1.000   |
| 3  | FO Energy                      | 0.894         | 1.000             | 1.000 | 0.965   |
| 4  | FO Entropy                     | 0.623         | 0.838             | 1.000 | 0.820   |
| 5  | FO InterquartileRange          | 0.794         | 1.000             | 0.892 | 0.895   |
| 6  | FO Kurtosis                    | 0.735         | 1.000             | 0.709 | 0.815   |
| 7  | FO Maximum                     | 0.802         | 1.000             | 0.976 | 0.926   |
| 8  | FO MeanAbsoluteDeviation       | 0.810         | 1.000             | 0.873 | 0.894   |
| 9  | FO Mean                        | 0.958         | 1.000             | 0.987 | 0.981   |
| 10 | FO Median                      | 0.944         | 1.000             | 0.968 | 0.971   |
| 11 | FO Minimum                     | 0.722         | 1.000             | 0.894 | 0.872   |
| 12 | FO Range                       | 0.799         | 1.000             | 0.966 | 0.922   |
| 13 | FO RobustMeanAbsoluteDeviation | 0.796         | 1.000             | 0.862 | 0.886   |
| 14 | FO RootMeanSquared             | 1.000         | 1.000             | 1.000 | 1.000   |
| 15 | FO Skewness                    | 0.767         | 1.000             | 0.675 | 0.814   |
| 16 | FO TotalEnergy                 | 0.894         | 1.000             | 0.997 | 0.964   |
| 17 | FO Uniformity                  | 0.703         | 0.889             | 1.000 | 0.864   |
| 18 | FO Variance                    | 0.810         | 1.000             | 0.995 | 0.935   |
| 19 | GLCM Autocorrelation           | 0.562         | 0.822             | 0.731 | 0.705   |
| 20 | GLCM ClusterProminence         | 0.742         | 0.928             | 0.524 | 0.731   |
| 21 | GLCM ClusterShade              | 0.567         | 0.832             | 0.787 | 0.728   |
| 22 | GLCM ClusterTendency           | 0.764         | 0.953             | 1.000 | 0.906   |
| 23 | GLCM Contrast                  | 0.703         | 0.889             | 0.524 | 0.705   |
| 24 | GLCM Correlation               | 0.601         | 0.809             | 0.524 | 0.645   |
| 25 | GLCM DifferenceAverage         | 0.605         | 0.838             | 0.524 | 0.655   |
| 26 | GLCM DifferenceEntropy         | 0.562         | 0.844             | 0.524 | 0.643   |
| 27 | GLCM DifferenceVariance        | 0.524         | 0.524             | 0.524 | 0.524   |
| 28 | GLCM Id                        | 0.566         | 0.819             | 0.524 | 0.636   |
| 29 | GLCM Idm                       | 0.566         | 0.825             | 0.524 | 0.638   |
| 30 | GLCM Idmn                      | 0.566         | 0.774             | 0.524 | 0.621   |
| 31 | GLCM Idn                       | 0.590         | 0.855             | 0.524 | 0.656   |
| 32 | GLCM Imc1                      | 0.524         | 0.524             | 0.524 | 0.524   |
| 33 | GLCM Imc2                      | 0.524         | 0.524             | 0.524 | 0.524   |
| 34 | GLCM InverseVariance           | 0.629         | 0.840             | 0.968 | 0.812   |
| 35 | GLCM JointAverage              | 0.581         | 0.826             | 0.589 | 0.665   |
| 36 | GLCM JointEnergy               | 0.587         | 0.810             | 0.524 | 0.640   |
| 37 | GLCM JointEntropy              | 0.577         | 0.814             | 0.535 | 0.642   |
| 38 | GLCM MCC                       | 0.609         | 0.801             | 0.524 | 0.645   |
| 39 | GLCM MaximumProbability        | 0.644         | 0.825             | 0.525 | 0.665   |
| 40 | GLCM SumAverage                | 0.571         | 0.826             | 0.608 | 0.668   |
| 41 | GLCM SumEntropy                | 0.557         | 0.821             | 0.526 | 0.635   |
| 42 | GLCM SumSquares                | 0.768         | 0.958             | 1.000 | 0.909   |

**Table ST4.** Scores of three different classifiers, Random Forest, Gradient Boosting and Support Vector Machines, for each radiomic feature individually corresponding to the categories *first order* and *GLCM*.

| ID | Feature                                   | Random Forest | Gradient Boosting | SVM   | Average |
|----|-------------------------------------------|---------------|-------------------|-------|---------|
| 43 | GLDM DependenceEntropy                    | 0.628         | 0.837             | 0.996 | 0.820   |
| 44 | GLDM DependenceNonUniformity              | 0.588         | 0.825             | 0.524 | 0.646   |
| 45 | GLDM DependenceNonUniformityNormalized    | 0.709         | 0.896             | 1.000 | 0.868   |
| 46 | GLDM DependenceVariance                   | 0.634         | 0.853             | 1.000 | 0.829   |
| 47 | GLDM GrayLevelNonUniformity               | 0.669         | 0.858             | 0.877 | 0.801   |
| 48 | GLDM GrayLevelVariance                    | 0.524         | 0.524             | 0.524 | 0.524   |
| 49 | GLDM HighGrayLevelEmphasis                | 0.564         | 0.825             | 0.737 | 0.709   |
| 50 | GLDM LargeDependenceEmphasis              | 0.598         | 0.836             | 0.638 | 0.691   |
| 51 | GLDM LargeDependenceHighGrayLevelEmphasis | 0.717         | 0.887             | 1.000 | 0.868   |
| 52 | GLDM LargeDependenceLowGrayLevelEmphasis  | 0.551         | 0.794             | 0.556 | 0.633   |
| 53 | GLDM LowGrayLevelEmphasis                 | 0.524         | 0.524             | 0.524 | 0.524   |
| 54 | GLDM SmallDependenceEmphasis              | 0.636         | 0.841             | 0.524 | 0.667   |
| 55 | GLDM SmallDependenceHighGrayLevelEmphasis | 0.716         | 0.967             | 0.524 | 0.736   |
| 56 | GLDM SmallDependenceLowGrayLevelEmphasis  | 0.661         | 0.844             | 1.000 | 0.835   |
| 57 | GLRLM GrayLevelNonUniformity              | 0.661         | 0.850             | 0.744 | 0.752   |
| 58 | GLRLM GrayLevelNonUniformityNormalized    | 0.737         | 0.904             | 1.000 | 0.881   |
| 59 | GLRLM GrayLevelVariance                   | 0.717         | 0.922             | 1.000 | 0.880   |
| 60 | GLRLM HighGrayLevelRunEmphasis            | 0.567         | 0.819             | 0.744 | 0.710   |
| 61 | GLRLM LongRunEmphasis                     | 0.594         | 0.747             | 0.524 | 0.622   |
| 62 | GLRLM LongRunHighGrayLevelEmphasis        | 0.582         | 0.794             | 0.734 | 0.703   |
| 63 | GLRLM LongRunLowGrayLevelEmphasis         | 0.711         | 0.773             | 0.524 | 0.669   |
| 64 | GLRLM LowGrayLevelRunEmphasis             | 0.727         | 0.920             | 1.000 | 0.882   |
| 65 | GLRLM RunEntropy                          | 0.566         | 0.821             | 0.524 | 0.637   |
| 66 | GLRLM RunLengthNonUniformity              | 0.649         | 0.854             | 0.924 | 0.809   |
| 67 | GLRLM RunLengthNonUniformityNormalized    | 0.575         | 0.829             | 0.524 | 0.643   |
| 68 | GLRLM RunPercentage                       | 0.593         | 0.833             | 0.524 | 0.650   |
| 69 | GLRLM RunVariance                         | 0.660         | 0.762             | 0.524 | 0.649   |
| 70 | GLRLM ShortRunEmphasis                    | 0.571         | 0.830             | 0.524 | 0.642   |
| 71 | GLRLM ShortRunHighGrayLevelEmphasis       | 0.589         | 0.831             | 0.734 | 0.718   |
| 72 | GLRLM ShortRunLowGrayLevelEmphasis        | 0.731         | 0.904             | 1.000 | 0.878   |
| 73 | GLSZM GrayLevelNonUniformity              | 0.745         | 0.902             | 1.000 | 0.882   |
| 74 | GLSZM GrayLevelNonUniformityNormalized    | 0.722         | 0.893             | 1.000 | 0.872   |
| 75 | GLSZM GrayLevelVariance                   | 0.651         | 0.883             | 0.524 | 0.686   |
| 76 | GLSZM HighGrayLevelZoneEmphasis           | 0.603         | 0.840             | 0.756 | 0.733   |
| 77 | GLSZM LargeAreaEmphasis                   | 0.712         | 0.901             | 0.524 | 0.712   |
| 78 | GLSZM LargeAreaHighGrayLevelEmphasis      | 0.679         | 0.872             | 0.780 | 0.777   |
| 79 | GLSZM LargeAreaLowGrayLevelEmphasis       | 0.748         | 0.840             | 0.524 | 0.704   |
| 80 | GLSZM LowGrayLevelZoneEmphasis            | 0.524         | 0.524             | 0.524 | 0.524   |
| 81 | GLSZM SizeZoneNonUniformity               | 0.778         | 0.945             | 1.000 | 0.908   |
| 82 | GLSZM SizeZoneNonUniformityNormalized     | 0.585         | 0.813             | 0.524 | 0.641   |
| 83 | GLSZM SmallAreaEmphasis                   | 0.580         | 0.805             | 0.524 | 0.636   |
| 84 | GLSZM SmallAreaHighGrayLevelEmphasis      | 0.566         | 0.840             | 0.739 | 0.715   |
| 85 | GLSZM SmallAreaLowGrayLevelEmphasis       | 0.729         | 0.916             | 1.000 | 0.882   |
| 86 | GLSZM ZoneEntropy                         | 0.524         | 0.524             | 0.524 | 0.524   |
| 87 | GLSZM ZonePercentage                      | 0.665         | 0.873             | 0.524 | 0.687   |
| 88 | GLSZM ZoneVariance                        | 0.709         | 0.896             | 0.524 | 0.710   |
| 89 | NGTDM Busyness                            | 0.713         | 0.925             | 0.694 | 0.777   |
| 90 | NGTDM Coarseness                          | 0.657         | 0.841             | 0.999 | 0.832   |
| 91 | NGTDM Complexity                          | 0.591         | 0.849             | 0.796 | 0.746   |
| 92 | NGTDM Contrast                            | 0.573         | 0.806             | 0.524 | 0.634   |
| 93 | NGTDM Strength                            | 0.760         | 0.975             | 1.000 | 0.912   |

**Table ST5.** Scores of three different classifiers, Random Forest, Gradient Boosting and Support Vector Machines, for each radiomic feature individually corresponding to the categories *GLDM*, *GLRLM*, *GLSZM* and *NGTDM*.
